# Supplementary material for: Molecular basis of hemoglobin adaptation in the high-flying bar-headed goose
Source: PubMed Central journal article supplement (PMC5903655; doi:10.1371/journal.pgen.1007331), 2018-04-02

A

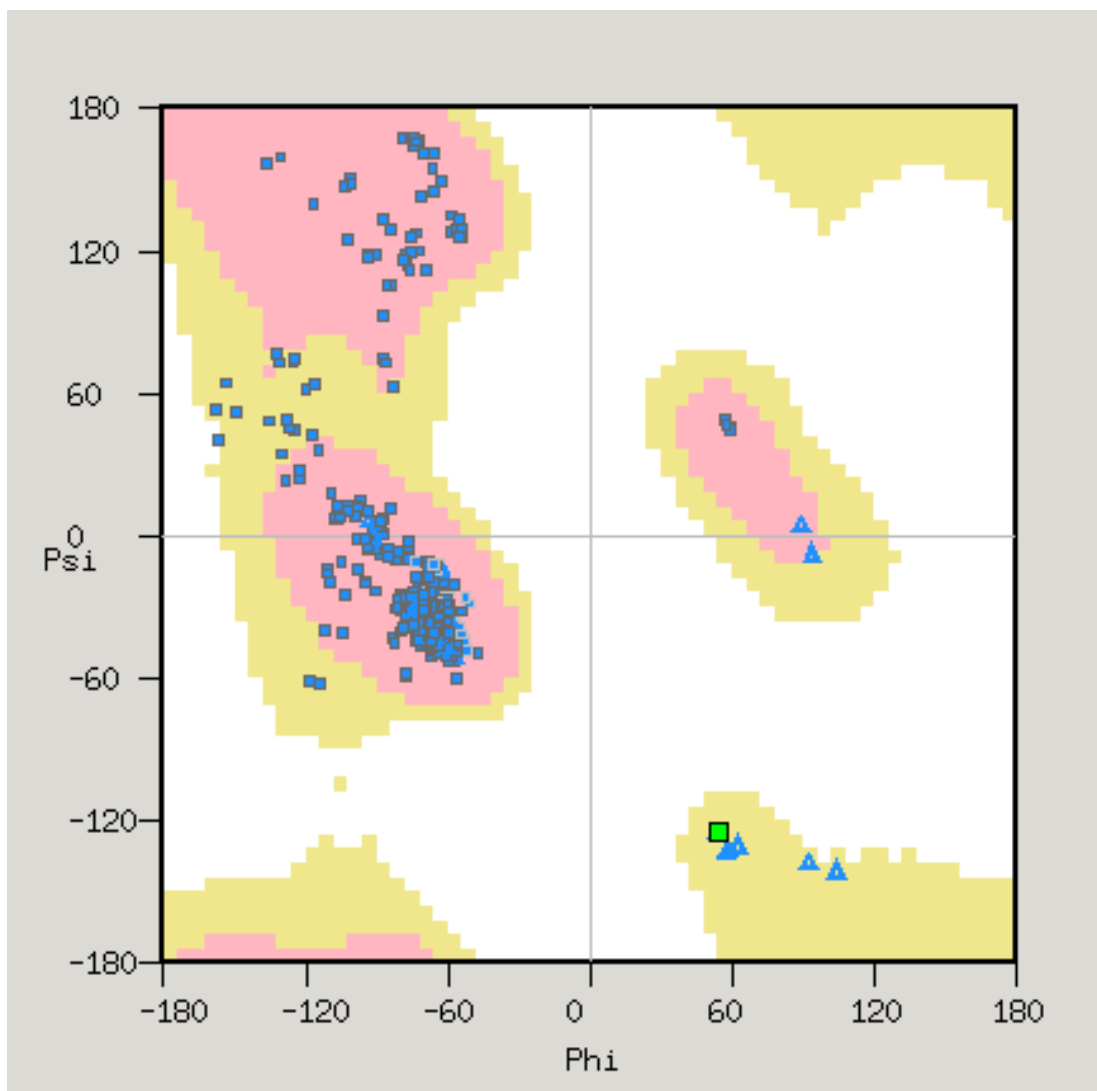

B

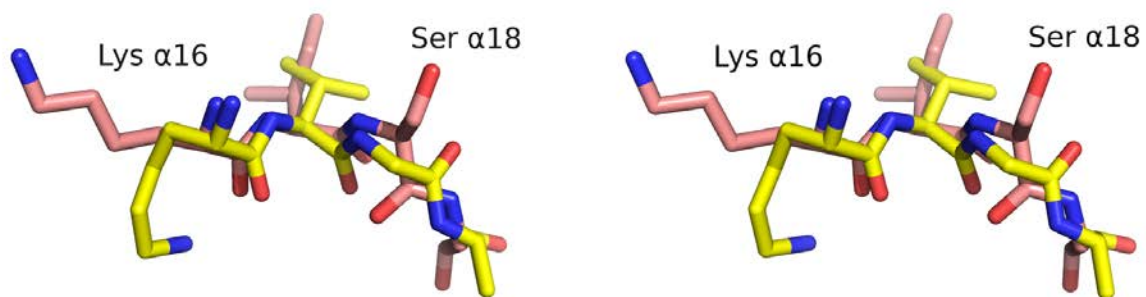

Supplement: pgen.1007331.s003.pdf [file pgen.1007331.s003.pdf]
